# Supplementary material
Source: MDPI journal article supplement (https://www.mdpi.com/1424-2818/13/9/437)
Supplement: s1 [file s1]

**Tommasi N., Ferrari A., Labra A., Galimberti A., Biella P.\*, Harnessing the power of metabarcoding in the ecological interpretation of plant-pollinator DNA data: strategies and consequences of filtering approaches. Diversity 2021, 13**

Text S1 - Script for estimating filtering thresholds with an approach based on ROC curves.

The following lines can be run in the R environment, please note that implementations different from the following one are possible, and they might affect the estimated thresholds.

```
# the data of the table below the script are to be included in an object named "y"

fit1 <- glm(reads ~ label, family="quasipoisson", data=y) #estimate the false positives

predictions <- data.frame(label = y$label, pred = NA)

predictions[, "pred"] <- predict(fit1, type="response")

#estimate cutting thresholds

require(pROC)

roc1 <- roc(as.factor(predictions$label), predictions$pred, quiet=T)

coords(roc1, "best")[1] #threshold

#data: see the following table. Load the reads per taxon (rows) in a sample
```

| reads | label |
|-------|-------|
| 9     | P     |
| 5     | P     |
| 14    | P     |
| 0     | N     |
| 0     | N     |
| 13    | P     |
| 415   | P     |
| 132   | P     |
| 4     | P     |
| 76    | P     |
| 370   | P     |
| 21    | P     |

|      |   |
|------|---|
| 0    | N |
| 0    | N |
| 184  | P |
| 0    | N |
| 0    | N |
| 0    | N |
| 0    | N |
| 145  | P |
| 2    | P |
| 5    | P |
| 2    | P |
| 0    | N |
| 0    | N |
| 0    | N |
| 13   | P |
| 5968 | P |
| 29   | P |
| 12   | P |
| 412  | P |
| 1007 | P |
| 0    | N |
| 0    | N |
| 0    | N |
| 0    | N |
| 0    | N |
| 0    | N |
| 137  | P |
| 0    | N |
| 0    | N |
| 0    | N |
| 0    | N |
| 0    | N |
